# Supplementary material for: A robust solid oxide electrolyzer for highly efficient electrochemical reforming of methane and steam
Source: Royal Society of Chemistry journal article supplement (doi:10.1039/c9ta00467j), 2019-01-01
Supplement: c9ta00467j1.pdf [file c9ta00467j1.pdf]

## Electronic Supporting Information

### ***A robust solid oxide electrolyzer for highly efficient electrochemical reforming of methane and steam***

Tong Liu,<sup>\*ab</sup> Hao Liu,<sup>a</sup> Xiaoyu Zhang,<sup>a</sup> Libin Lei,<sup>c</sup> Yanxiang Zhang,<sup>d</sup> Zhihao Yuan,<sup>e</sup> Fanglin Chen,<sup>c</sup> and Yao Wang<sup>\*ab</sup>

<sup>a</sup> School of Power and Mechanical Engineering, Wuhan University, Wuhan, Hubei 430072, China

<sup>b</sup> Suzhou Institute of Wuhan University, Suzhou, Jiangsu 215123, China

<sup>c</sup> Department of Mechanical Engineering, University of South Carolina, Columbia, SC 29208, USA

<sup>d</sup> National Key Laboratory for Precision Hot Processing of Metals, School of Materials Science and Engineering, Harbin Institute of Technology, Harbin 150001, China

<sup>e</sup> School of Materials Science and Engineering, Tianjin University of Technology, Tianjin 300384, China

\* Corresponding authors:

Email: [liu\\_tong@whu.edu.cn](mailto:liu_tong@whu.edu.cn) (T. Liu) and [pmewy@whu.edu.cn](mailto:pmewy@whu.edu.cn) (Y. Wang)

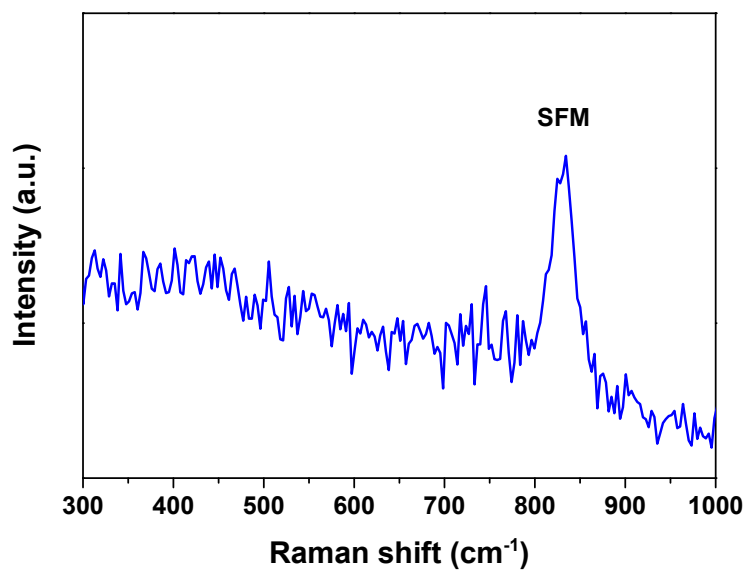

Figure S1 Raman spectra for SFM powders used in this work.

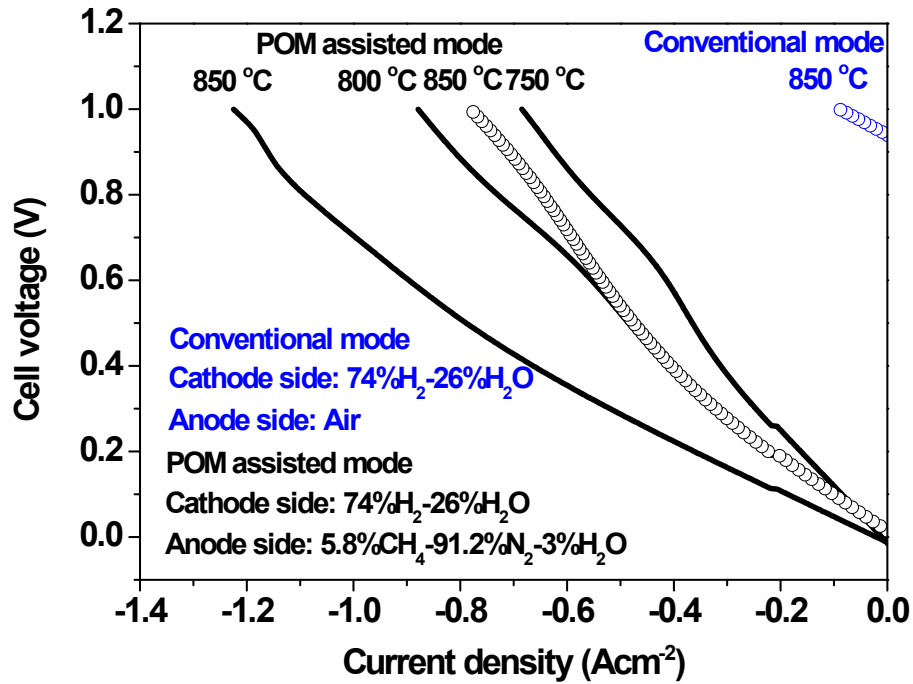

Figure S2  $i$ - $V$  curves of solid oxide electrolyzers for steam electrolysis in conventional mode and POM assisted mode. The solid line (—) and open circle (○) represent Ru-SFM-SDC/LSGM/SFM-SDC and SFM-SDC/LSGM/SFM-SDC electrolyzers, respectively, while the black and blue colors denote the POM assisted mode and conventional mode, respectively.

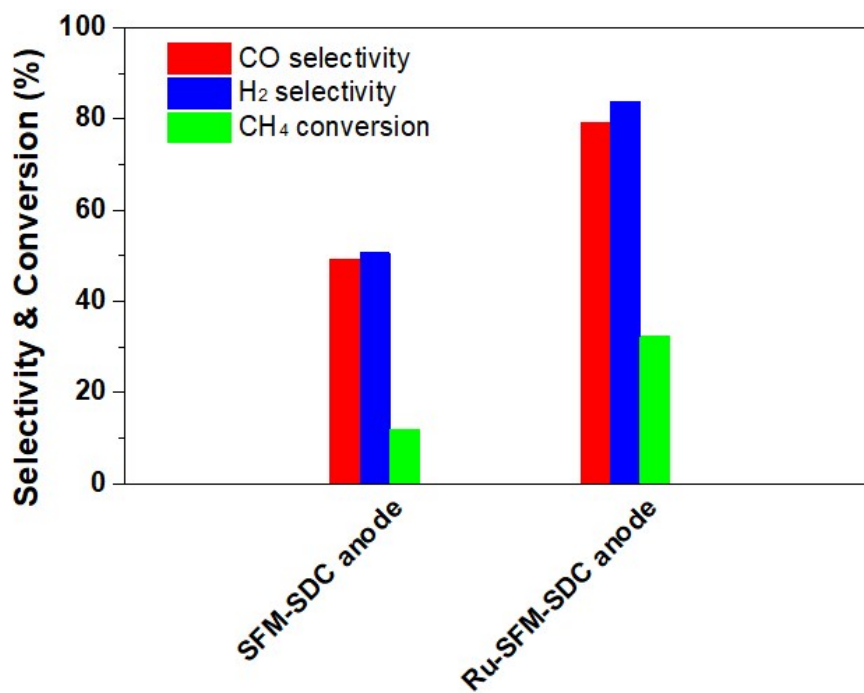

Figure S3 CH<sub>4</sub> conversion, CO selectivity and H<sub>2</sub> selectivity in the anode of the two electrolyzers with SFM-SDC anode and Ru-SFM-SDC anode operated in POM assisted mode at 850 °C and OCV condition. During the operation, the anode and the cathode are exposed to 5.8%CH<sub>4</sub>-91.2%N<sub>2</sub>-3%H<sub>2</sub>O and 74%H<sub>2</sub>-26%H<sub>2</sub>O atmosphere, respectively.
